# Supplementary material
Source: PubMed Central journal article supplement (PMC3091254)
Supplement: supp_M110.194167_jbc.M110.194167-1.pdf [file supp_M110.194167_jbc.M110.194167-1.pdf]

# Figure S1

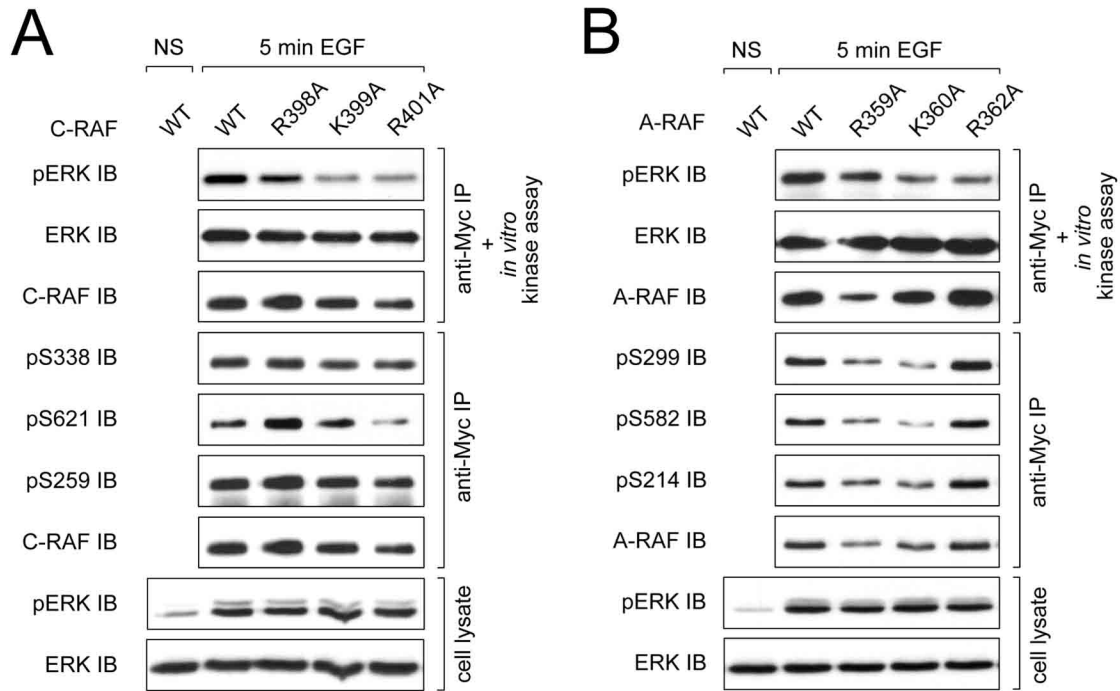

**FIGURE S1: Single substitution of basic residues within the RKTR motif inhibits EGF-mediated activation of C-RAF and A-RAF.**

Myc-tagged RAF WT and indicated mutants were expressed in COS7 cells under starvation conditions. Before lysis, the cells were treated with EGF (100 ng/ml) for 5 min. The kinases were immunoprecipitated by anti-Myc antibody and catalytic activity was analyzed in an *in vitro* kinase assay using purified MEK and ERK as substrates. Phosphorylation status of RAF kinases was analyzed by use of appropriate phospho-specific antibodies. (A) Kinase activity and phosphorylation status of the C-RAF RKTR mutants. (B) Kinase activity and phosphorylation status of the A-RAF RKTR mutants.
